# Supplementary material for: KLF5 Is Activated by Gene Amplification in Gastric Cancer and Is Essential for Gastric Cell Proliferation
Source: MDPI journal article supplement (doi:10.3390/cells10051002), 2021-04-24
Supplement: s1 [file s1]

## Supplement data

### Supplement tables

Supplement table 1. Relationship between the CNV of KLF5 and the molecular subtypes of gastric cancer. Number in the parenthesis is the percentage of all patients.

| <b>Copy</b> | <b>-2</b> | <b>-1</b> | <b>0</b> | <b>1</b> | <b>2</b> |
|-------------|-----------|-----------|----------|----------|----------|
| <b>CIN</b>  | 1(0.3)    | 30(10.2)  | 41(14)   | 71(24.2) | 4(1.4)   |
| <b>EBV</b>  | 0         | 1(0.3)    | 18(6.1)  | 7(2.4)   | 0        |
| <b>GS</b>   | 0         | 0         | 38(13)   | 19(6.5)  | 0        |
| <b>MSI</b>  | 0         | 1(0.3)    | 46(15.7) | 12(4.1)  | 4(1.4)   |

Supplement table 2. Relationship between KLF5 copy number and TP53 mutation status. Number in the parenthesis is the percentage of all patients.

| <b>KLF5 Copy</b> | <b>CNV</b> | <b>Diploid</b> |
|------------------|------------|----------------|
| TP53 Wildtype    | 59(20.5)   | 93(32.4)       |
| TP53 Mutated     | 86(30)     | 49(17.1)       |

Supplement table 3. Multivariate logistic regression analysis for KLF5 expression in gastric cancer.

|                          | <b>Estimate</b> | <b>SD</b> | <b>OR (95% CI)</b> | <b>z</b> | <b>P (&gt; z )</b> |
|--------------------------|-----------------|-----------|--------------------|----------|--------------------|
| Lauren Class (Diffuse)   | -1.11           | 0.39      | 0.33(0.15,0.71)    | -2.83    | 0.005**            |
| Lauren Class (Mixed)     | 1.27            | 0.79      | 3.55(0.92,23.5)    | 1.61     | 0.11               |
| TP53 mutation (Mutation) | -0.99           | 0.38      | 0.37(0.17,0.77)    | -2.57    | 0.01*              |
| Molecular Subtype (EBV)  | -0.46           | 0.59      | 0.63(0.2,2.06)     | -0.79    | 0.43               |
| Molecular Subtype (GS)   | -0.49           | 0.49      | 0.61(0.23,1.62)    | -0.99    | 0.32               |
| Molecular Subtype (MSI)  | 1.98            | 0.64      | 7.24(2.37,31.63)   | 3.10     | 0.002**            |

Abbreviation: OR, odds ratio; CI, confidence interval. \*P < 0.05, \*\*P < 0.01.

Supplement table 4. Public datasets analyzing the whole transcriptome of KLF5 knockout mice

| <b>Author</b> | <b>Model</b>        | <b>Platform</b> | <b>Accession</b> | <b>Information</b> | <b>Reference</b> |
|---------------|---------------------|-----------------|------------------|--------------------|------------------|
| 2017 Azami T  | Mouse embryos E3.0  | Microarray      | GSE65020         | embryo             | [1]              |
| 2014 Xing C   | Mouse adults        | Microarray      | GSE58719         | prostate           | [2]              |
| 2012 Bell SM  | Mouse embryos E14.5 | Microarray      | GSE39624         | intestine          |                  |
| 2011 Bell SM  | Mouse embryos E14.5 | Microarray      | GSE27014         | bladder            | [3]              |
| 2016 Noah F   | Mouse adults        | RNAseq          | GSE79758         | intestine          |                  |

Supplement table 5. Top 84 differentially expressed genes comparing wildtype and Klf5 knockout mouse across 4 datasets.

| Gene Symbol | Gene Name                                                   | logFC | AveExpr | t      | P Value  | adj.P.Val |
|-------------|-------------------------------------------------------------|-------|---------|--------|----------|-----------|
| Elf3        | E74-like factor 3<br>mannoside<br>acetylglucosaminyltransfe | -3.28 | 9.53    | -29.35 | 7.48E-10 | 1.20E-06  |
| Mgat4a      | ase 4, isoenzyme A                                          | -2.21 | 9.93    | -23.49 | 4.88E-09 | 3.70E-06  |
| Mpzl2       | myelin protein zero-like 2                                  | -1.68 | 10.32   | -22.70 | 6.51E-09 | 4.26E-06  |
| Eps8l2      | EPS8-like 2                                                 | -1.37 | 9.63    | -20.14 | 1.77E-08 | 7.74E-06  |
| Baiap2l1    | BAI1-associated protein 2-<br>like 1                        | -1.40 | 9.25    | -17.86 | 4.81E-08 | 1.34E-05  |
| Acsm3       | acyl-CoA synthetase<br>medium-chain family<br>member 3      | -1.91 | 7.43    | -17.65 | 5.30E-08 | 1.36E-05  |
| Pglyrp1     | peptidoglycan recognition<br>protein 1                      | -1.19 | 7.91    | -16.28 | 1.04E-07 | 2.16E-05  |
| Ckmt1       | creatine kinase,<br>mitochondrial 1,<br>ubiquitous          | -1.82 | 8.39    | -16.24 | 1.06E-07 | 2.18E-05  |
| Reep6       | receptor accessory<br>protein 6                             | -1.55 | 11.36   | -15.60 | 1.47E-07 | 2.79E-05  |
| Dgat2       | diacylglycerol O-<br>acyltransferase 2                      | -1.15 | 9.91    | -15.31 | 1.72E-07 | 2.92E-05  |
| BC025446    | cDNA sequence BC025446<br>GH regulated TBC protein          | -1.56 | 7.07    | -14.43 | 2.80E-07 | 3.88E-05  |
| Grtp1       | 1                                                           | -1.24 | 9.68    | -14.21 | 3.18E-07 | 4.29E-05  |
| Klf5        | Kruppel-like factor 5<br>lectin, galactose binding,         | -1.32 | 11.02   | -14.14 | 3.32E-07 | 4.43E-05  |
| Lgals9      | soluble 9                                                   | -1.52 | 9.91    | -13.71 | 4.26E-07 | 5.02E-05  |
| Sprr2a3     | small proline-rich protein<br>2A3                           | -1.24 | 8.59    | -13.64 | 4.44E-07 | 5.07E-05  |
| Plip        | plasma membrane<br>proteolipid                              | -1.67 | 7.79    | -13.35 | 5.29E-07 | 5.52E-05  |
| Tjp3        | tight junction protein 3<br>G protein-coupled               | -1.18 | 9.16    | -13.28 | 5.55E-07 | 5.63E-05  |
| Gprc5a      | receptor, family C, group<br>5, member A                    | -0.87 | 8.36    | -12.83 | 7.33E-07 | 6.86E-05  |
| Tspan8      | tetraspanin 8                                               | -1.57 | 8.97    | -12.14 | 1.15E-06 | 9.82E-05  |
| Mboat1      | membrane bound O-<br>acyltransferase domain<br>containing 1 | -1.13 | 10.06   | -12.06 | 1.21E-06 | 9.99E-05  |
| Sh2d4a      | SH2 domain containing 4A<br>small cell adhesion             | -1.34 | 8.19    | -12.05 | 1.22E-06 | 9.99E-05  |
| Smagp       | glycoprotein                                                | -1.12 | 9.20    | -12.07 | 1.21E-06 | 9.99E-05  |
| Sprr2a1     | small proline-rich protein<br>2A1                           | -1.68 | 9.26    | -12.09 | 1.19E-06 | 9.99E-05  |

|               |                                                                                 |       |       |        |          |          |
|---------------|---------------------------------------------------------------------------------|-------|-------|--------|----------|----------|
| Tpd52         | tumor protein D52                                                               | -0.89 | 10.25 | -11.39 | 1.92E-06 | 1.37E-04 |
| Lgals12       | lectin, galactose binding,<br>soluble 12                                        | -0.98 | 7.26  | -11.25 | 2.13E-06 | 1.46E-04 |
| Krt7          | keratin 7                                                                       | -0.96 | 10.04 | -11.04 | 2.47E-06 | 1.65E-04 |
| 2200002D01Rik | RIKEN cDNA 2200002D01<br>gene                                                   | -0.76 | 9.10  | -10.78 | 2.97E-06 | 1.79E-04 |
| St6galnac2    |                                                                                 | -0.95 | 10.18 | -10.45 | 3.81E-06 | 2.14E-04 |
| Pof1b         | premature ovarian failure<br>1B                                                 | -1.37 | 6.51  | -10.44 | 3.85E-06 | 2.15E-04 |
| Rab17         | RAB17, member RAS<br>oncogene family                                            | -1.32 | 9.19  | -10.43 | 3.87E-06 | 2.15E-04 |
| Cmb1          | carboxymethylenebutenol<br>idase-like (Pseudomonas)                             | -0.91 | 8.35  | -10.40 | 3.98E-06 | 2.16E-04 |
| Tspan1        | tetraspanin 1                                                                   | -1.22 | 7.50  | -10.41 | 3.95E-06 | 2.16E-04 |
| Ppl           | periplakin                                                                      | -0.74 | 8.70  | -10.16 | 4.76E-06 | 2.45E-04 |
| Krt8          | keratin 8                                                                       | -0.81 | 12.05 | -9.98  | 5.50E-06 | 2.69E-04 |
| Stard10       | START domain containing<br>10                                                   | -0.79 | 11.92 | -9.79  | 6.40E-06 | 2.98E-04 |
| Myo5b         | myosin VB                                                                       | -1.41 | 9.89  | -9.75  | 6.62E-06 | 3.02E-04 |
| Lass3         | LAG1 homolog, ceramide<br>synthase 3                                            | -1.46 | 7.49  | -9.55  | 7.78E-06 | 3.39E-04 |
| Grb7          | growth factor receptor<br>bound protein 7                                       | -0.67 | 10.73 | -9.39  | 8.86E-06 | 3.70E-04 |
| Prr15l        | proline rich 15-like<br>FXFD domain-containing                                  | -0.84 | 8.82  | -9.39  | 8.88E-06 | 3.70E-04 |
| Fxyd3         | ion transport regulator 3                                                       | -0.98 | 8.58  | -9.04  | 1.19E-05 | 4.71E-04 |
| Ano9          | anoctamin 9                                                                     | -1.01 | 8.58  | -8.79  | 1.49E-05 | 5.57E-04 |
| Tacstd2       | tumor-associated calcium<br>signal transducer 2                                 | -1.46 | 7.36  | -8.68  | 1.65E-05 | 5.97E-04 |
| Sh3bgrl2      | SH3 domain binding<br>glutamic acid-rich protein<br>like 2                      | -0.59 | 9.73  | -8.59  | 1.78E-05 | 6.27E-04 |
| Gpx2          | glutathione peroxidase 2                                                        | -2.32 | 8.59  | -7.84  | 3.56E-05 | 1.05E-03 |
| Trp53inp1     | transformation related<br>protein 53 inducible<br>nuclear protein 1             | 0.58  | 10.46 | 7.84   | 3.59E-05 | 1.05E-03 |
| Hmcn1         | hemacentin 1                                                                    | 0.56  | 8.18  | 7.81   | 3.69E-05 | 1.06E-03 |
| Ppargc1b      | peroxisome proliferative<br>activated receptor,<br>gamma, coactivator 1<br>beta | -0.55 | 8.72  | -7.80  | 3.71E-05 | 1.06E-03 |
| Rarb          | retinoic acid receptor,<br>beta                                                 | 0.67  | 10.83 | 7.67   | 4.20E-05 | 1.16E-03 |
| Rassf7        | Ras association<br>(RalGDS/AF-6) domain<br>family (N-terminal)<br>member 7      | -0.50 | 9.41  | -7.61  | 4.48E-05 | 1.22E-03 |

|          |                                                                                                 |       |       |       |          |          |
|----------|-------------------------------------------------------------------------------------------------|-------|-------|-------|----------|----------|
| Il17rc   | interleukin 17 receptor C                                                                       | -0.58 | 8.84  | -7.46 | 5.20E-05 | 1.33E-03 |
| Aim1l    | absent in melanoma 1-like<br>expressed sequence                                                 | -0.64 | 7.90  | -7.32 | 5.95E-05 | 1.46E-03 |
| Al661453 | Al661453                                                                                        | -0.52 | 7.69  | -7.24 | 6.52E-05 | 1.57E-03 |
| Upk1b    | uroplakin 1B                                                                                    | 0.92  | 10.21 | 7.23  | 6.53E-05 | 1.57E-03 |
| Nrn1     | neuritin 1                                                                                      | -1.07 | 9.61  | -7.19 | 6.85E-05 | 1.61E-03 |
| Spry2    | sprouty homolog 2<br>(Drosophila)                                                               | 0.50  | 9.43  | 7.14  | 7.23E-05 | 1.67E-03 |
| Rnpep    | arginyl aminopeptidase<br>(aminopeptidase B)                                                    | -0.50 | 11.50 | -7.09 | 7.62E-05 | 1.74E-03 |
| Hpse     | heparanase                                                                                      | -0.63 | 8.14  | -7.05 | 7.93E-05 | 1.79E-03 |
| Fgfr3    | fibroblast growth factor<br>receptor 3                                                          | -0.48 | 8.78  | -7.02 | 8.13E-05 | 1.81E-03 |
| Aldh1a2  | aldehyde dehydrogenase<br>family 1, subfamily A2                                                | 0.54  | 12.15 | 6.96  | 8.69E-05 | 1.87E-03 |
| Pparg    | peroxisome proliferator<br>activated receptor gamma                                             | -1.20 | 9.53  | -6.87 | 9.59E-05 | 2.01E-03 |
| Dpysl4   | dihydropyrimidinase-like<br>4                                                                   | 0.48  | 9.76  | 6.66  | 1.20E-04 | 2.35E-03 |
| Wfdc2    | WAP four-disulfide core<br>domain 2                                                             | -0.56 | 9.48  | -6.59 | 1.29E-04 | 2.48E-03 |
| Cnksr2   | connector enhancer of<br>kinase suppressor of Ras 2                                             | 0.53  | 8.63  | 6.53  | 1.39E-04 | 2.62E-03 |
| Elovl1   | elongation of very long<br>chain fatty acids<br>(FEN1/Elo2, SUR4/Elo3,<br>yeast)-like 1         | -0.44 | 11.51 | -6.48 | 1.47E-04 | 2.70E-03 |
| Pwwp2b   | PWWP domain containing<br>2B                                                                    | -0.44 | 8.60  | -6.46 | 1.50E-04 | 2.75E-03 |
| Msln     | mesothelin                                                                                      | -0.53 | 7.68  | -6.45 | 1.51E-04 | 2.76E-03 |
| Sept3    | septin 3                                                                                        | 0.52  | 10.67 | 6.45  | 1.52E-04 | 2.77E-03 |
| Serinc2  | serine incorporator 2                                                                           | 0.67  | 10.74 | 6.30  | 1.78E-04 | 3.12E-03 |
| Prr13    | proline rich 13                                                                                 | -0.51 | 9.81  | -6.25 | 1.90E-04 | 3.28E-03 |
| Jakmip1  | janus kinase and<br>microtubule interacting<br>protein 1                                        | -0.52 | 8.30  | -6.17 | 2.07E-04 | 3.49E-03 |
| Ezr      | ezrin                                                                                           | -0.40 | 11.57 | -6.00 | 2.54E-04 | 4.03E-03 |
| Slc25a10 | solute carrier family 25<br>(mitochondrial carrier,<br>dicarboxylate<br>transporter), member 10 | -0.40 | 10.43 | -5.98 | 2.59E-04 | 4.09E-03 |
| Tinagl1  | tubulointerstitial nephritis<br>antigen-like 1                                                  | -0.57 | 10.02 | -5.96 | 2.65E-04 | 4.15E-03 |
| Perp     | PERP, TP53 apoptosis<br>effector                                                                | -0.86 | 8.38  | -5.93 | 2.76E-04 | 4.27E-03 |
| Cdkn1c   | cyclin-dependent kinase<br>inhibitor 1C (P57)                                                   | 0.54  | 11.74 | 5.91  | 2.80E-04 | 4.30E-03 |

|          |                                                                            |             |             |             |             |             |
|----------|----------------------------------------------------------------------------|-------------|-------------|-------------|-------------|-------------|
| Atrnl1   | attractin like 1                                                           | 0.48        | 10.85       | 5.82        | 3.12E-04    | 4.66E-03    |
| St8sia1  | ST8 alpha-N-acetyl-neuraminide alpha-2,8-sialyltransferase 1               | 0.74        | 9.15        | 5.73        | 3.49E-04    | 5.05E-03    |
| Sulf2    | sulfatase 2                                                                | 0.29        | 12.49       | 3.91        | 3.95E-03    | 0.03        |
| S100a14  | S100 calcium binding protein A14                                           | -0.29       | 6.07        | -2.69       | 0.03        | 0.08        |
| Gsn      | gelsolin                                                                   | 0.19        | 10.77       | 2.60        | 0.03        | 0.09        |
| Slc28a3  | solute carrier family 28 (sodium-coupled nucleoside transporter), member 3 | 0.17        | 6.38        | 1.77        | 0.11        | 0.23        |
| Tmprss2  | transmembrane protease, serine 2                                           | -0.07       | 10.00       | -0.71       | 0.49        | 0.65        |
| Scd1     | stearoyl-Coenzyme A desaturase 1                                           | 0.09        | 10.18       | 0.70        | 0.50        | 0.66        |
| Hsd17b14 | hydroxysteroid (17-beta) dehydrogenase 14                                  | Unavailable | Unavailable | Unavailable | Unavailable | Unavailable |

\*NOTE: All statistics are from dataset GSE39624.

## Supplement figure

Supplement figure. The relation between KLF5 and cell proliferation.

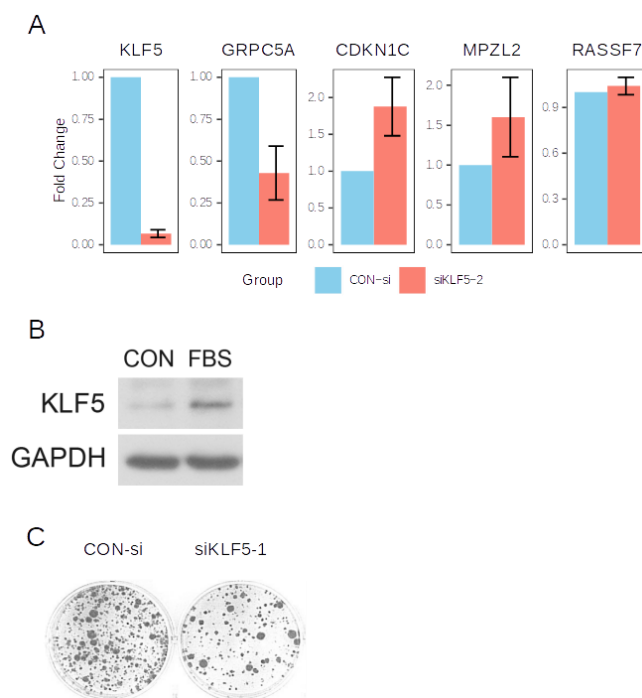

Supplement figure. The relation between KLF5 and cell proliferation. A, KLF5 silencing by siKLF5-2 and its effect on the expression of four genes. B, starvation assay showed that the expression of KLF5 increased

significantly upon FBS induction. C, clone formation assay showed SGC7901 formed much fewer clones after treatment with KLF5 siRNA.

### Supplement references

1. Azami, T.; Waku, T.; Matsumoto, K.; Jeon, H.; Muratani, M.; Kawashima, A.; Yanagisawa, J.; Manabe, I.; Nagai, R.; Kunath, T.; et al. Klf5 maintains the balance of primitive endoderm versus epiblast specification during mouse embryonic development by suppression of Fgf4. *Development* 2017, 144, 3706–3718, doi:10.1242/dev.150755.
2. Xing, C.; Ci, X.; Sun, X.; Fu, X.; Zhang, Z.; Dong, E.N.; Hao, Z.-Z.; Dong, J.-T. Klf5 deletion promotes Pten deletion-initiated luminal-type mouse prostate tumors through multiple oncogenic signaling pathways. *Neoplasia* 2014, 16, 883–99, doi:10.1016/j.neo.2014.09.006.
3. Bell, S.M.; Zhang, L.; Mendell, A.; Xu, Y.; Haitchi, H.M.; Lessard, J.L.; Whitsett, J.A. Kruppel-like factor 5 is required for formation and differentiation of the bladder urothelium. *Dev. Biol.* 2011, 358, 79–90, doi:10.1016/j.ydbio.2011.07.020.
